# Supplementary material for: Synthesis of Marine Cyclopeptide Galaxamide Analogues as Potential Anticancer Agents
Source: MDPI journal article supplement (doi:10.3390/md20030158), 2022-02-22
Supplement: s1 [file s1]

## **Supplementary Material**

### **Synthesis of Marine Cyclopeptide Galaxamide Analogues as Potential Anticancer Agents**

Daichun Li,<sup>#</sup> Xiaojian Liao,<sup>#</sup> Shenghui Zhong, Bingxin Zhao<sup>\*</sup> and Shihai Xu<sup>\*</sup>

*Department of Chemistry, College of Chemistry and Materials Science, Jinan University,  
Guangzhou 510632, China*

*\* Corresponding authors. E-mail addresses: zbx840622@163.com; txush@jnu.edu.cn;*

*zh.86.jiang@gmail.com.*

<sup>#</sup> These authors contributed equally to this work.

## Contents

|                                                                     |    |
|---------------------------------------------------------------------|----|
| <b>Figure S1.</b> HR-ESI-MS spectrum of <b>Z-1</b> .....            | 3  |
| <b>Figure S2.</b> <sup>1</sup> H NMR spectrum of <b>Z-1</b> .....   | 3  |
| <b>Figure S3.</b> <sup>13</sup> C NMR spectrum of <b>Z-1</b> .....  | 4  |
| <b>Figure S4.</b> HR-ESI-MS spectrum of <b>Z-2</b> .....            | 4  |
| <b>Figure S5.</b> <sup>1</sup> H NMR spectrum of <b>Z-2</b> .....   | 5  |
| <b>Figure S6.</b> <sup>13</sup> C NMR spectrum of <b>Z-2</b> .....  | 5  |
| <b>Figure S7.</b> HR-ESI-MS spectrum of <b>Z-3</b> .....            | 6  |
| <b>Figure S8.</b> <sup>1</sup> H NMR spectrum of <b>Z-3</b> .....   | 6  |
| <b>Figure S9.</b> <sup>13</sup> C NMR spectrum of <b>Z-3</b> .....  | 7  |
| <b>Figure S10.</b> HR-ESI-MS spectrum of <b>Z-4</b> .....           | 7  |
| <b>Figure S11.</b> <sup>1</sup> H NMR spectrum of <b>Z-4</b> .....  | 8  |
| <b>Figure S12.</b> <sup>13</sup> C NMR spectrum of <b>Z-4</b> ..... | 8  |
| <b>Figure S13.</b> HR-ESI-MS spectrum of <b>Z-5</b> .....           | 9  |
| <b>Figure S14.</b> <sup>1</sup> H NMR spectrum of <b>Z-5</b> .....  | 9  |
| <b>Figure S15.</b> <sup>13</sup> C NMR spectrum of <b>Z-5</b> ..... | 10 |
| <b>Figure S16.</b> HR-ESI-MS spectrum of <b>Z-6</b> .....           | 10 |
| <b>Figure S17.</b> <sup>1</sup> H NMR spectrum of <b>Z-6</b> .....  | 11 |
| <b>Figure S18.</b> <sup>13</sup> C NMR spectrum of <b>Z-6</b> ..... | 11 |
| <b>Figure S19.</b> HR-ESI-MS spectrum of <b>Z-7</b> .....           | 12 |
| <b>Figure S20.</b> <sup>1</sup> H spectrum of <b>Z-7</b> .....      | 12 |
| <b>Figure S21.</b> <sup>13</sup> C NMR spectrum <b>Z-7</b> .....    | 13 |
| <b>Figure S22.</b> HR-ESI-MS spectrum of <b>Z-8</b> .....           | 13 |
| <b>Figure S23.</b> <sup>1</sup> H spectrum of <b>Z-8</b> .....      | 14 |
| <b>Figure S24.</b> <sup>13</sup> C NMR spectrum <b>Z-8</b> .....    | 14 |

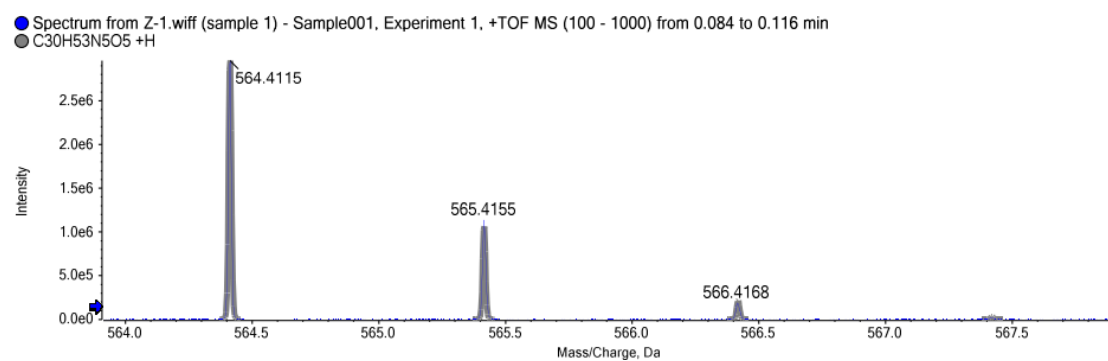

**Figure S1.** HR-ESI-MS spectrum of **Z-1**

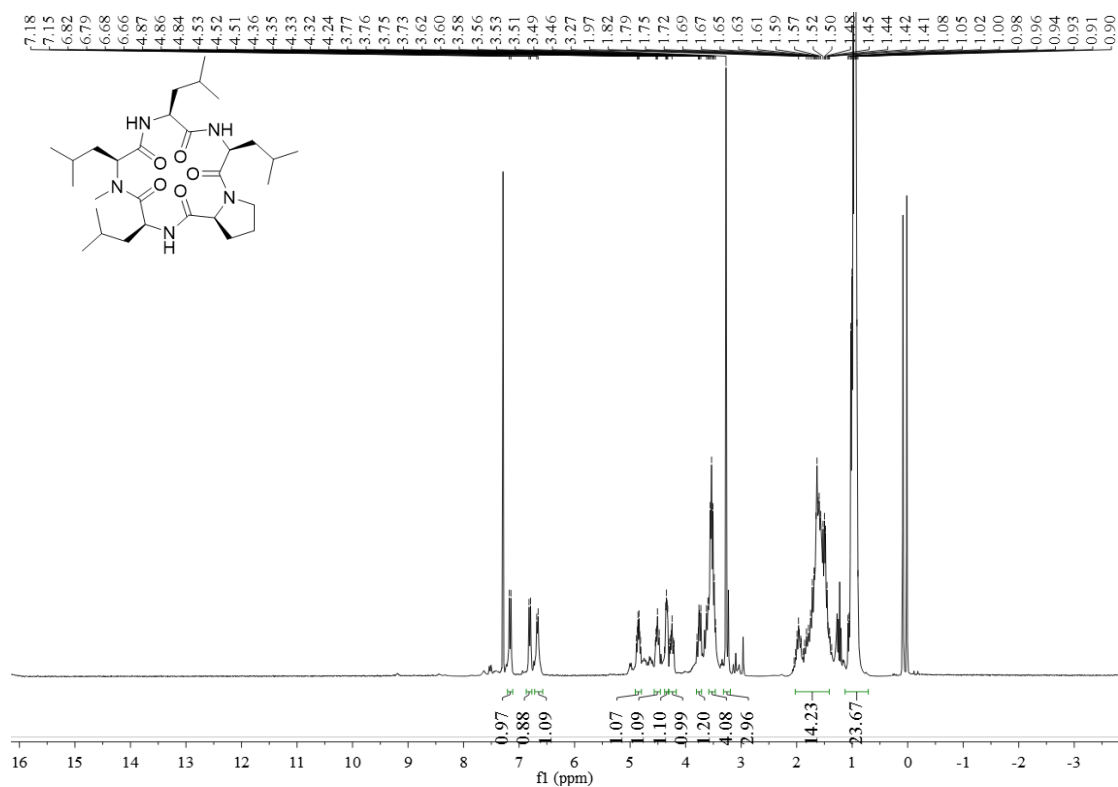

**Figure S2.** <sup>1</sup>H NMR spectrum of **Z-1**

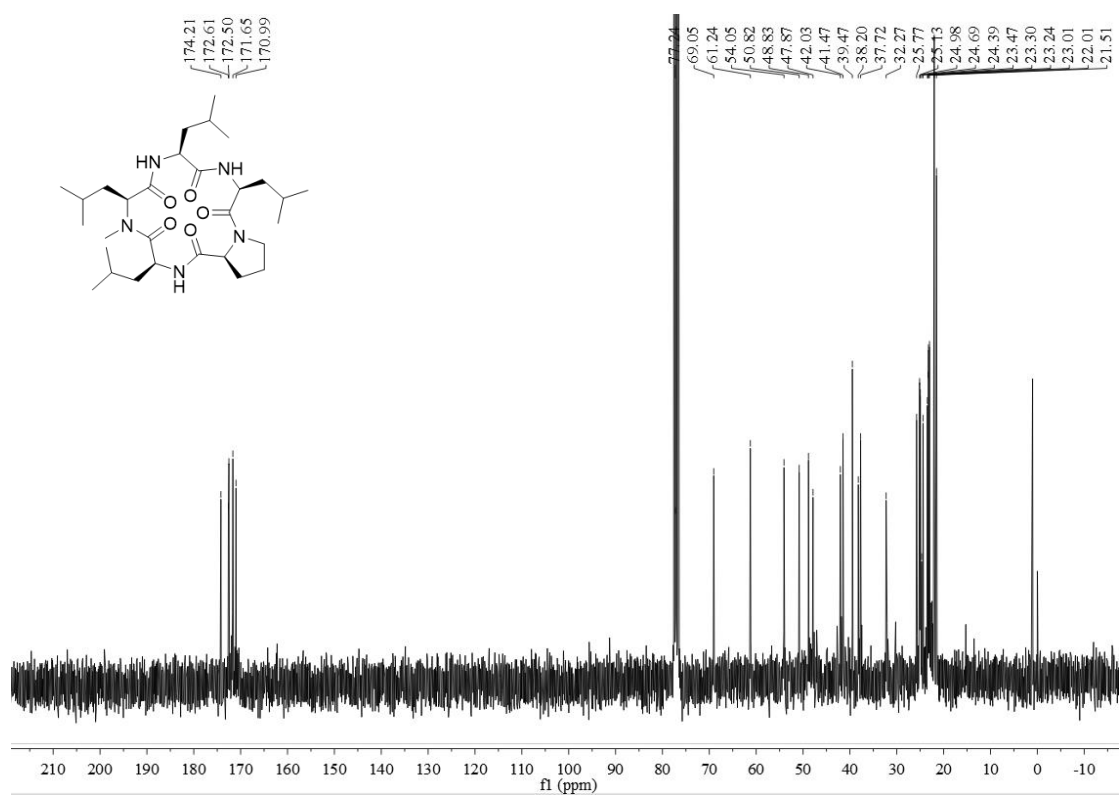

**Figure S3.**  $^{13}\text{C}$  NMR spectrum of **Z-1**

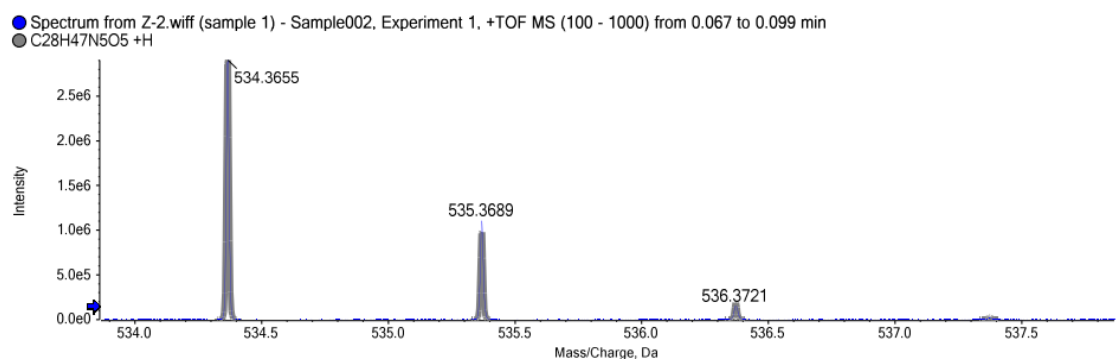

**Figure S4.** HR-ESI-MS spectrum of **Z-2**

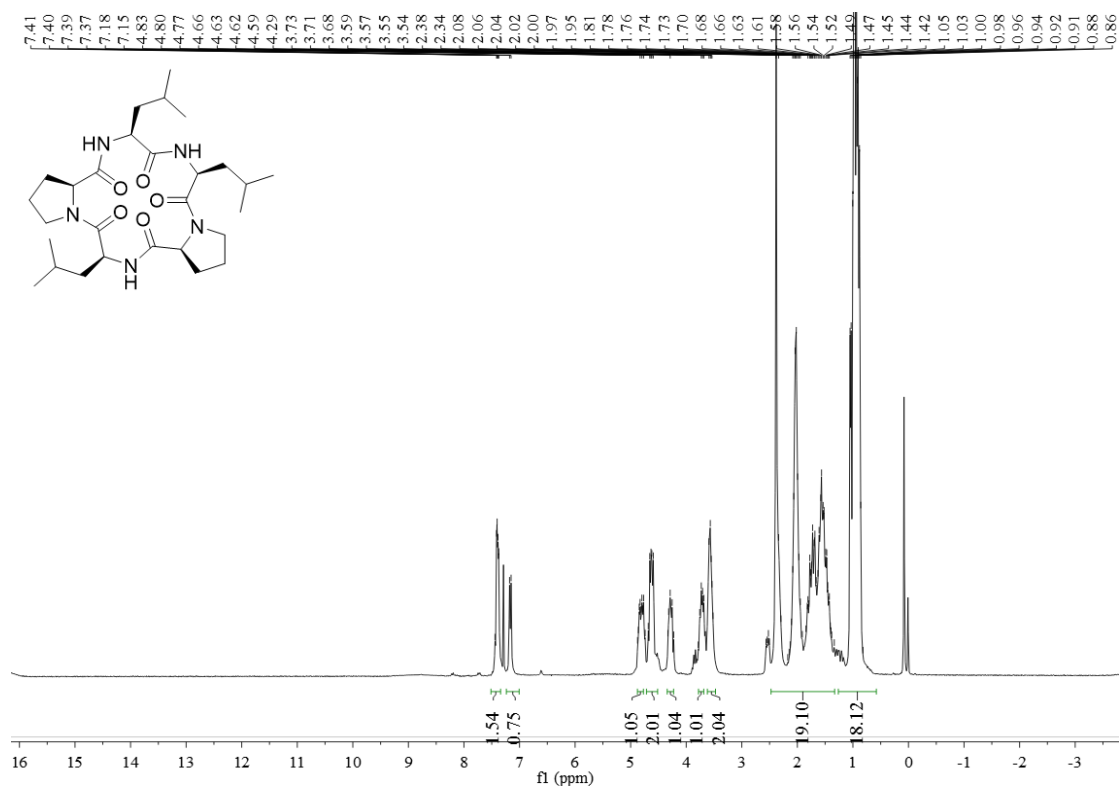

**Figure S5.**  $^1\text{H}$  NMR spectrum of **Z-2**

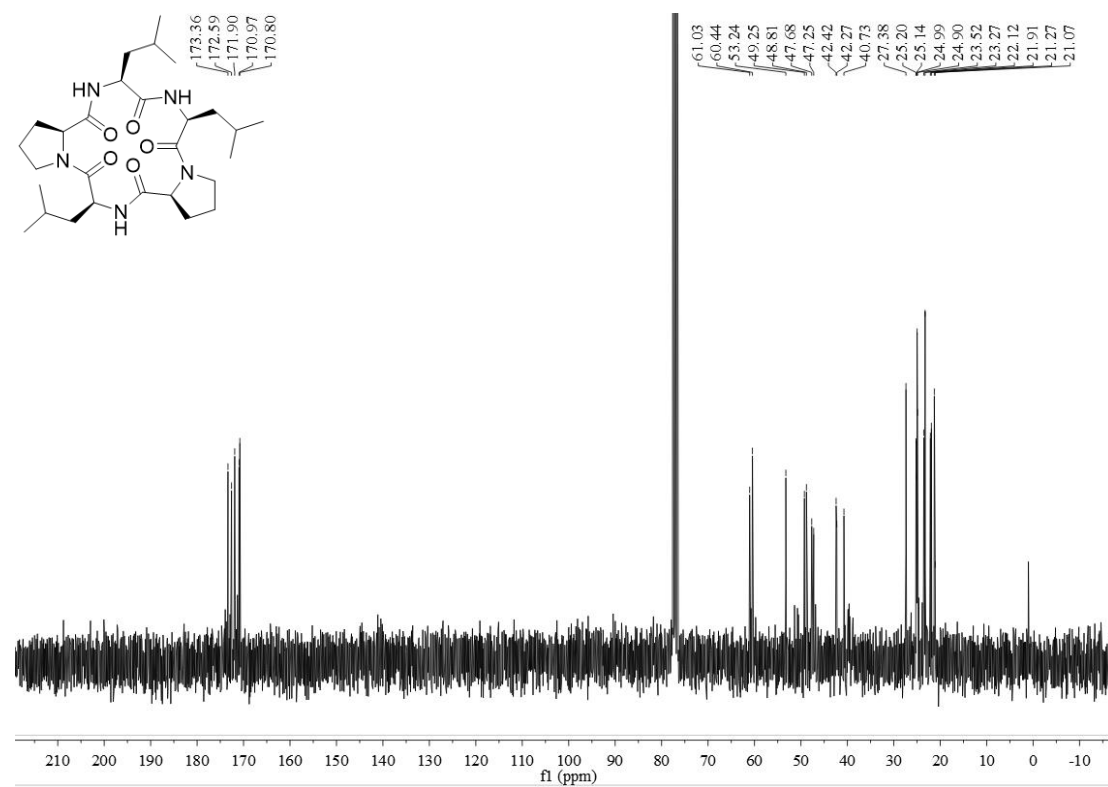

**Figure S6.**  $^{13}\text{C}$  NMR spectrum of **Z-2**

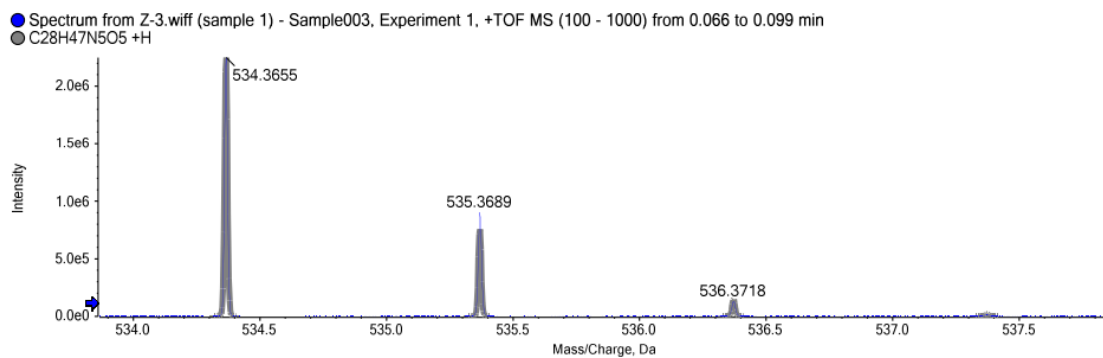

**Figure S7.** HR-ESI-MS spectrum of **Z-3**

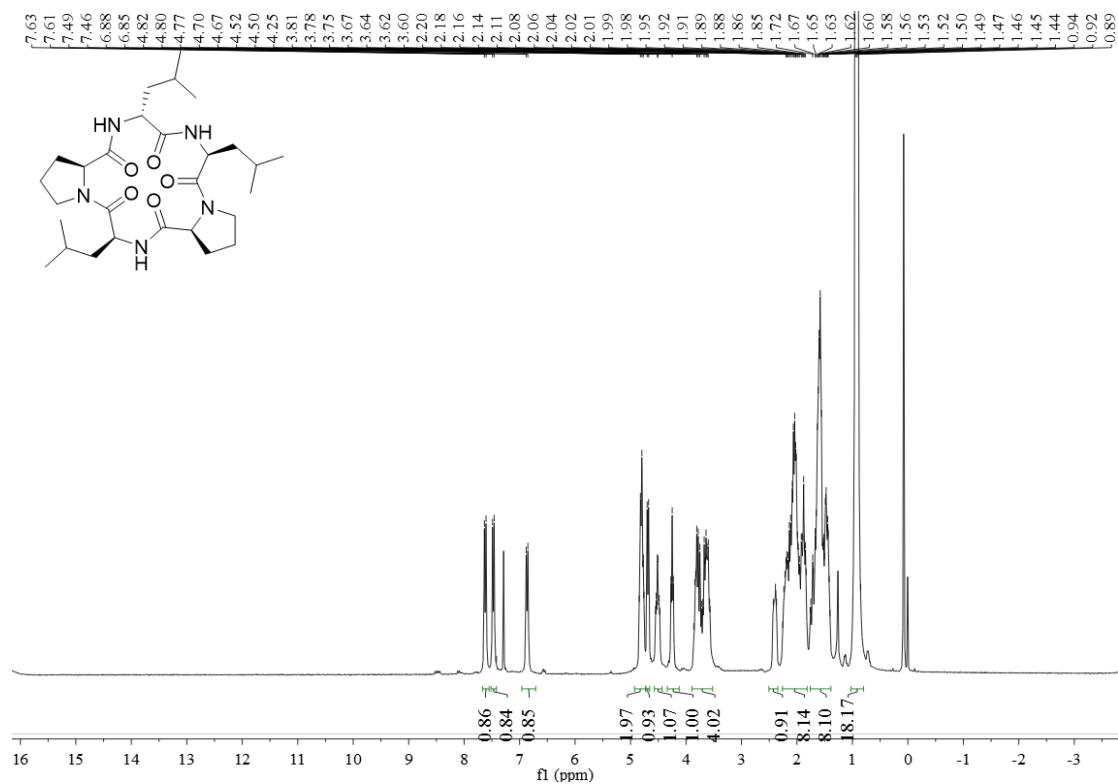

**Figure S8.** <sup>1</sup>H NMR spectrum of **Z-3**

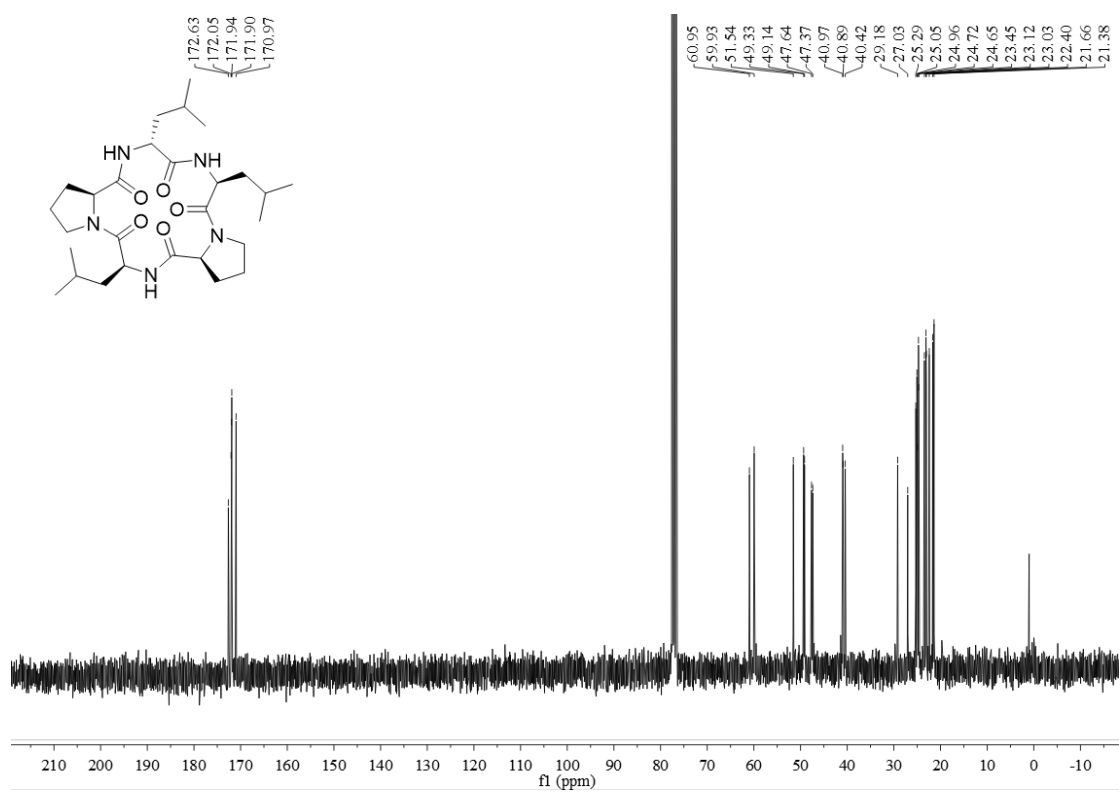

**Figure S9.**  $^{13}\text{C}$  NMR spectrum of **Z-3**

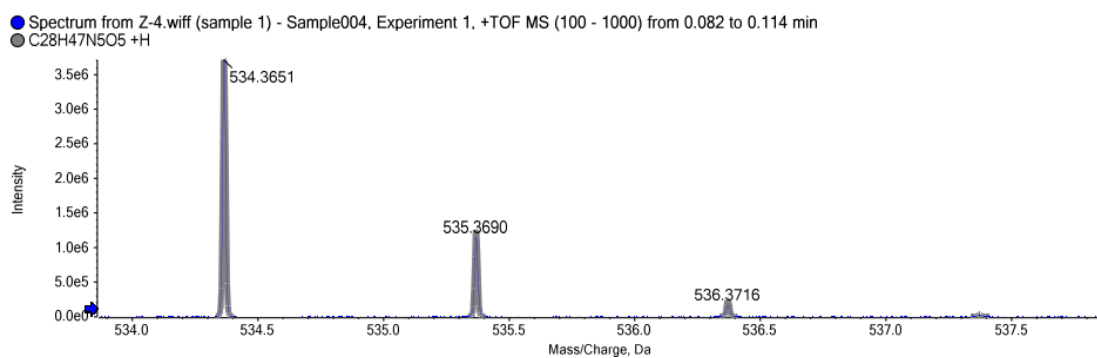

**Figure S10.** HR-ESI-MS spectrum of **Z-4**



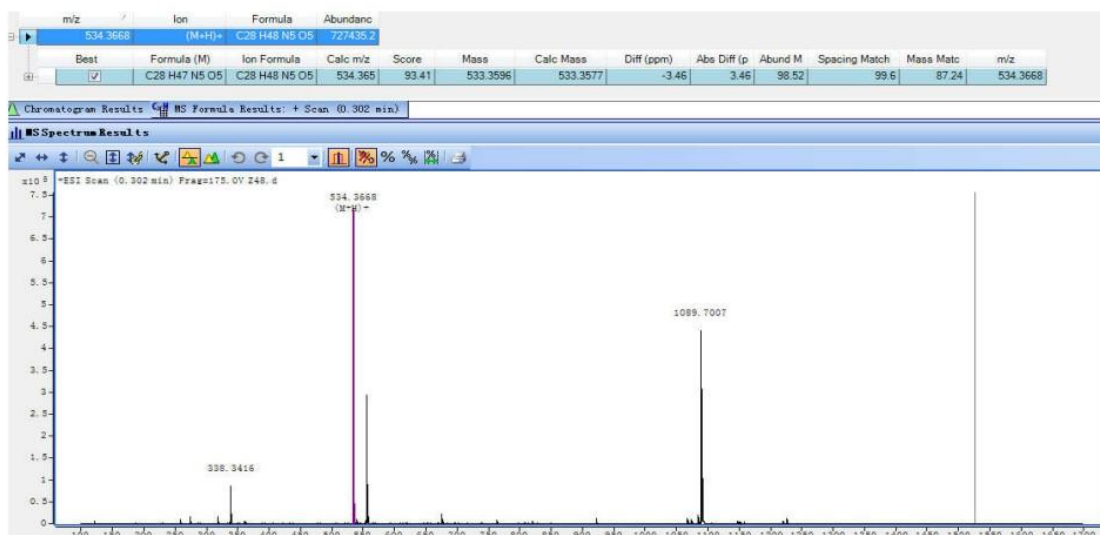

**Figure S13.** HR-ESI-MS spectrum of **Z-5**

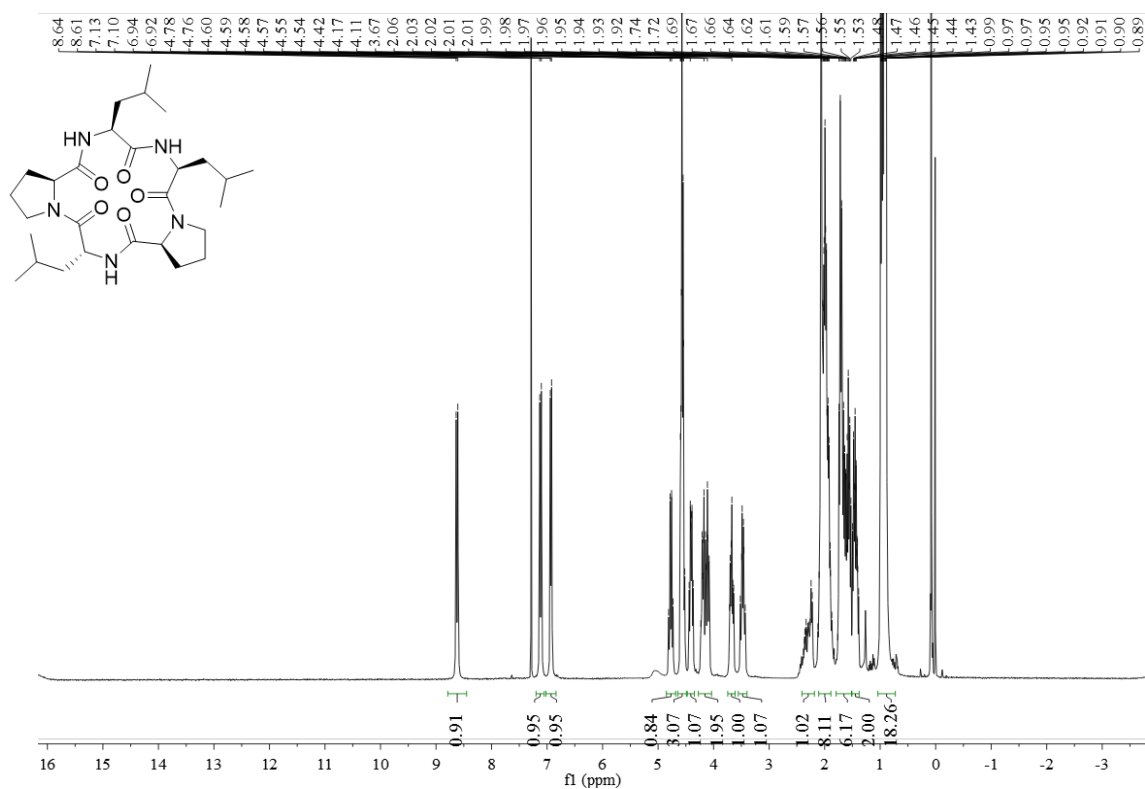

**Figure S14.** <sup>1</sup>H NMR spectrum of **Z-5**

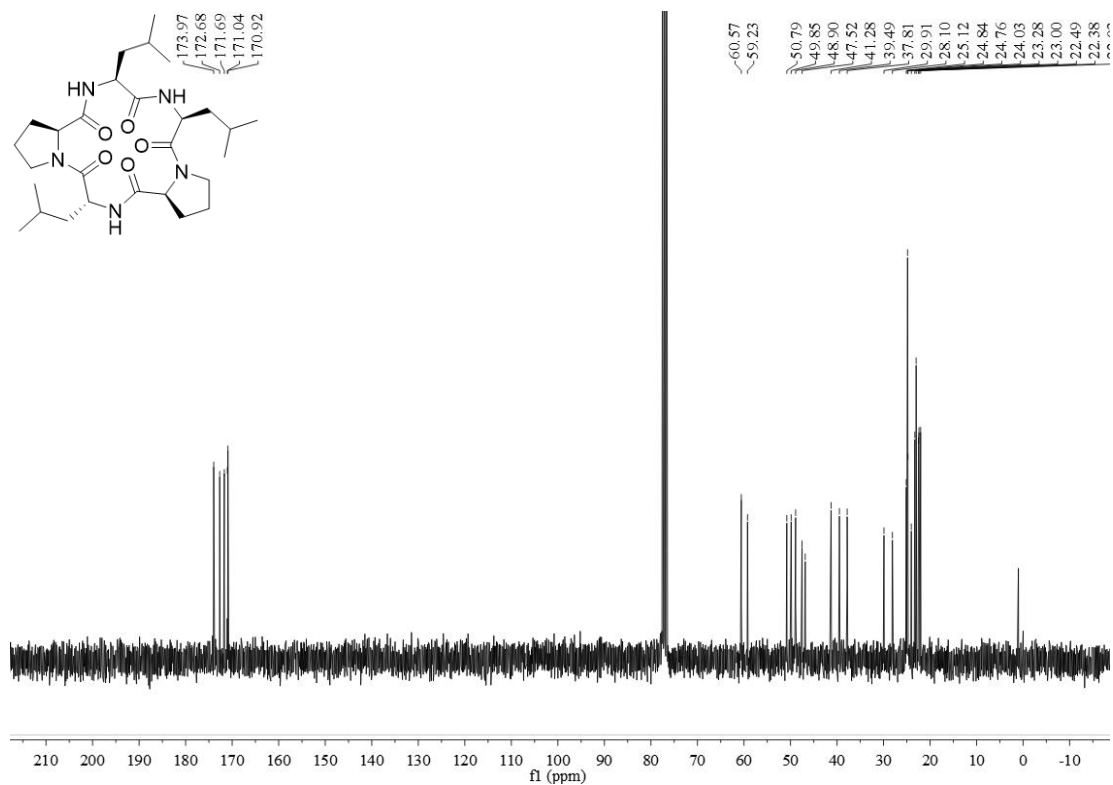

**Figure S15.**  $^{13}\text{C}$  NMR spectrum of **Z-5**

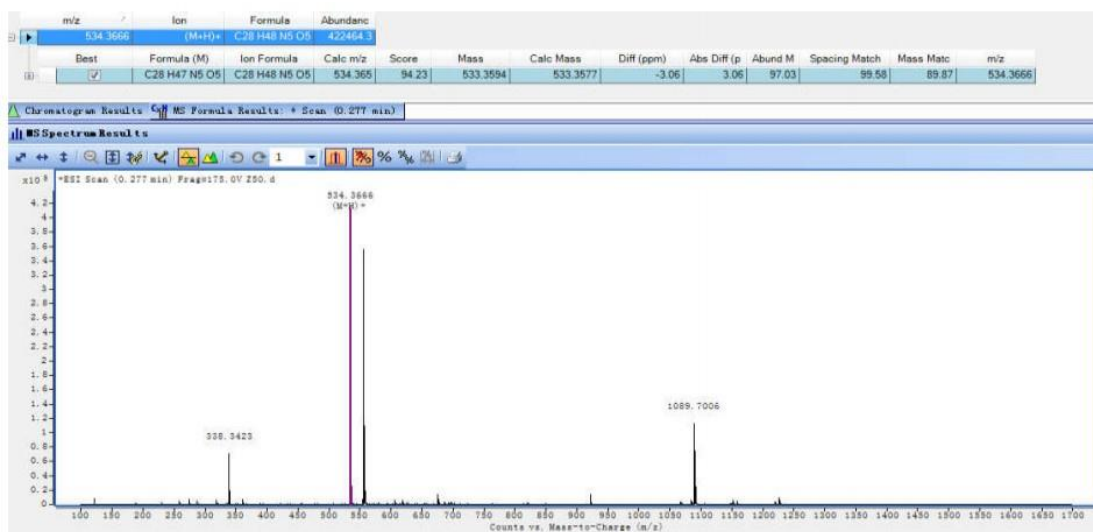

**Figure S16.** HR-ESI-MS spectrum of **Z-6**

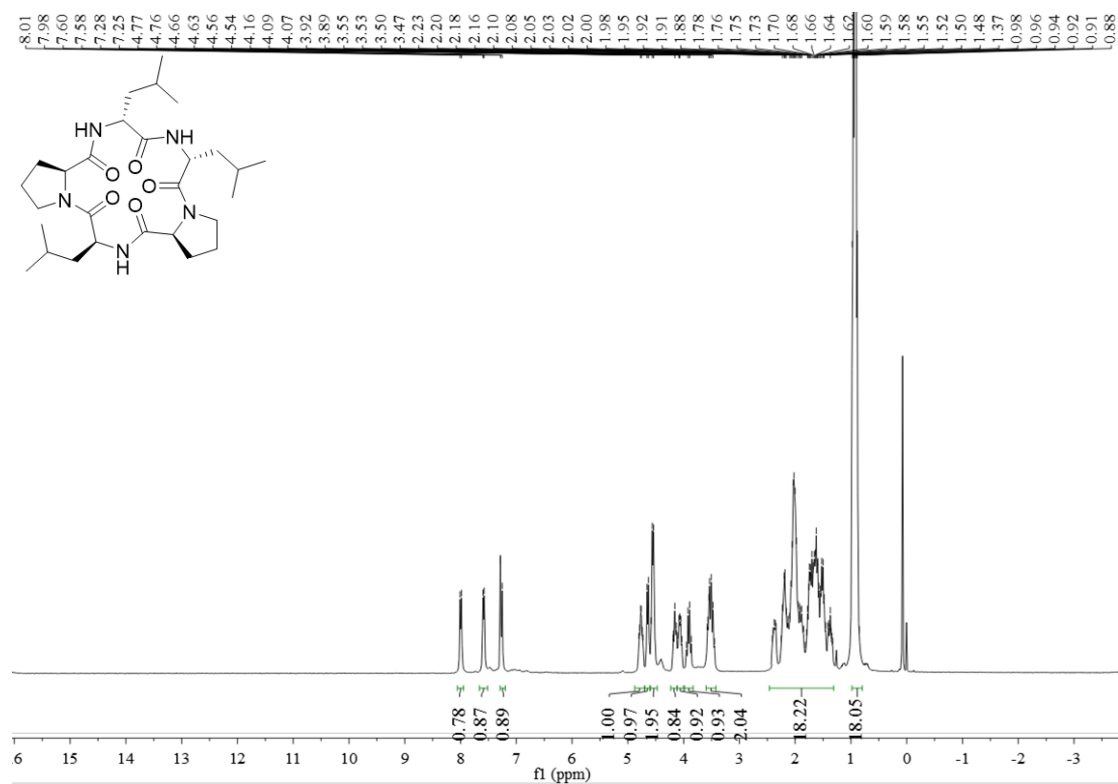

**Figure S17.**  $^1\text{H}$  NMR spectrum of **Z-6**

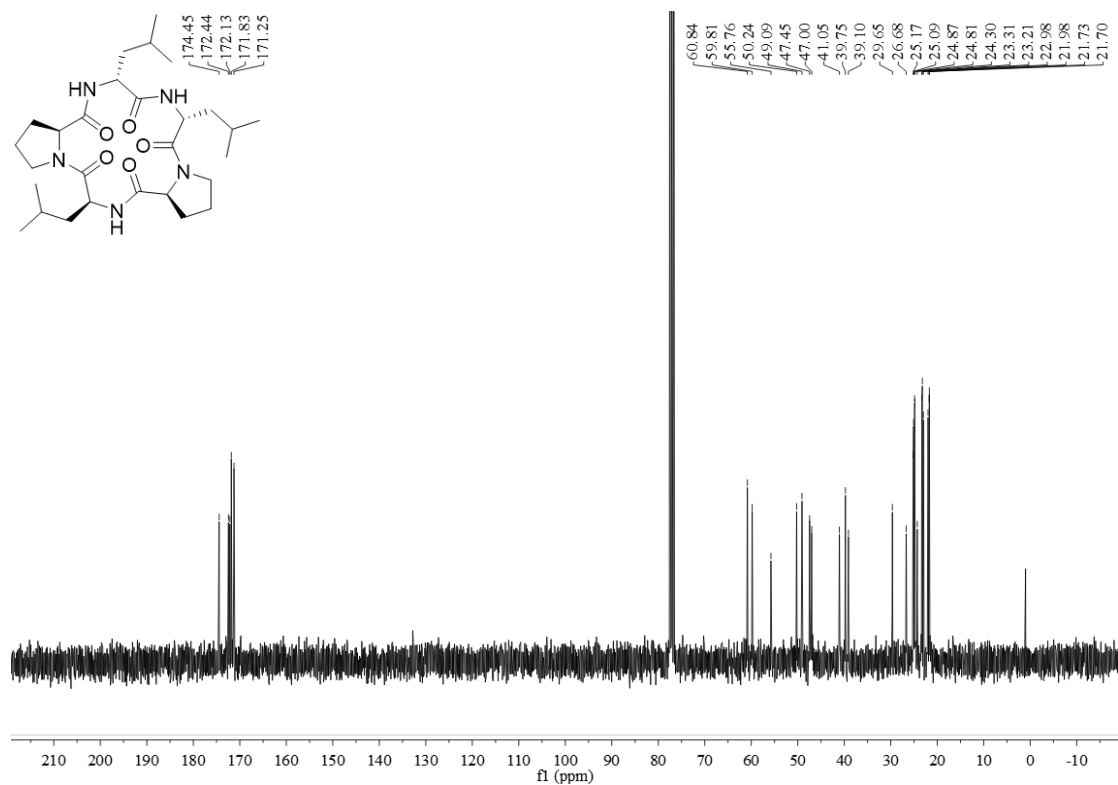

**Figure S18.**  $^{13}\text{C}$  NMR spectrum of **Z-6**

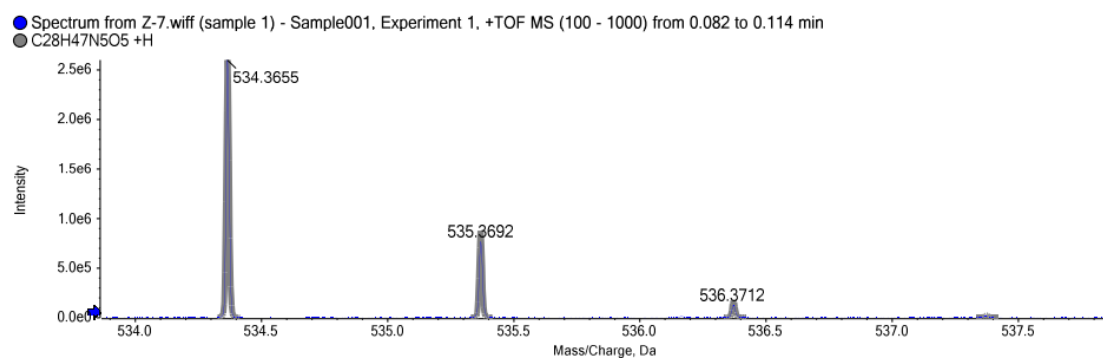

**Figure S19.** HR-ESI-MS spectrum of **Z-7**

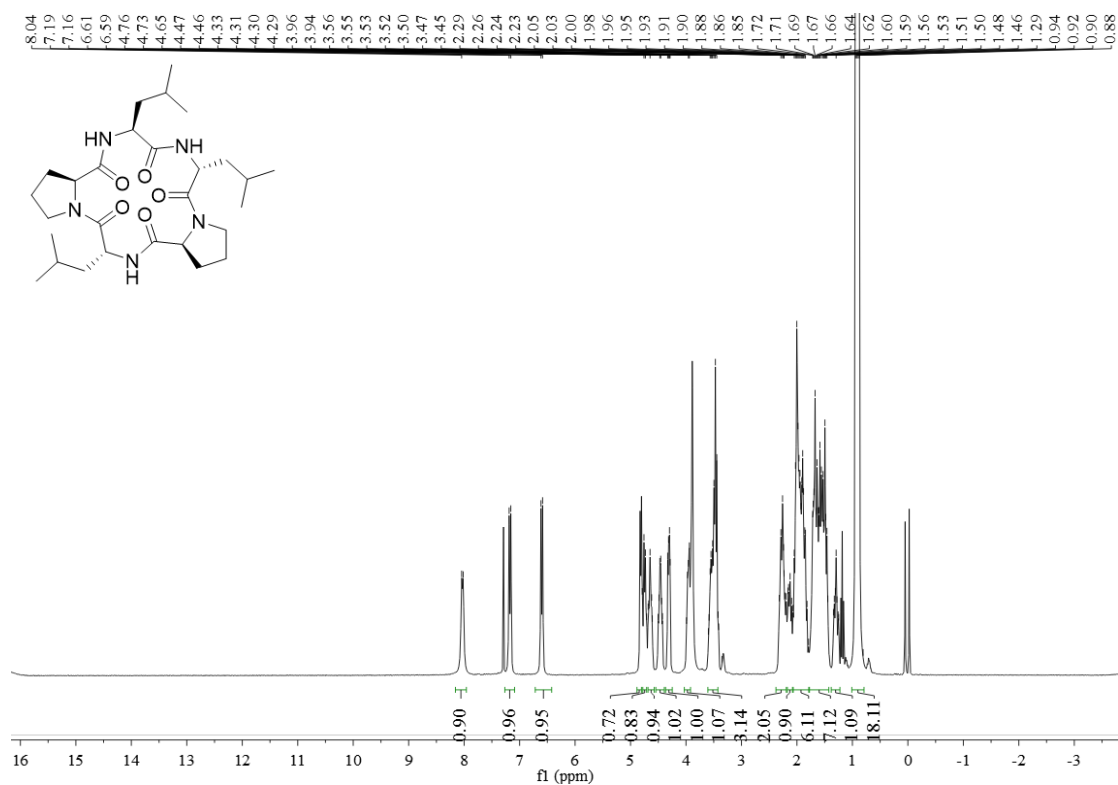

**Figure S20.** <sup>1</sup>H NMR spectrum of **Z-7**

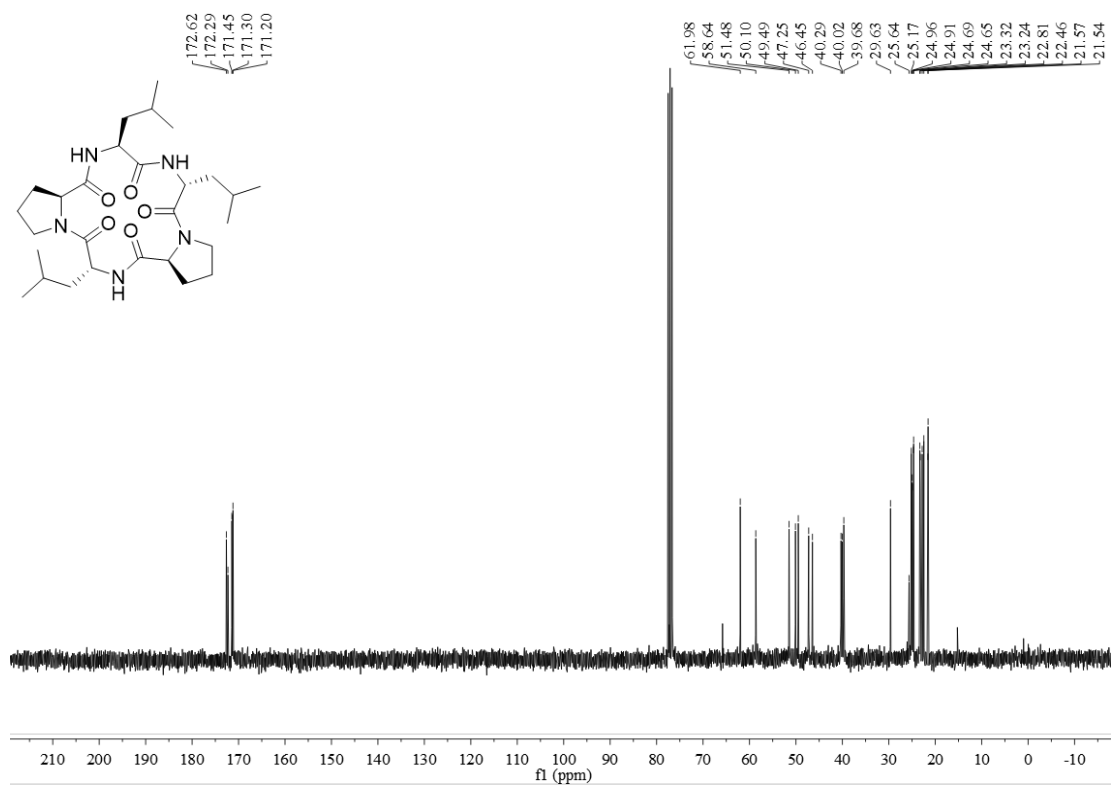

**Figure S21.**  $^{13}\text{C}$  NMR spectrum of **Z-7**

● Spectrum from Z-8.wiff (sample 1) - Sample002, Experiment 1, +TOF MS (100 - 1000) from 0.081 to 0.113 min  
 ● C<sub>28</sub>H<sub>47</sub>N<sub>5</sub>O<sub>5</sub> +H

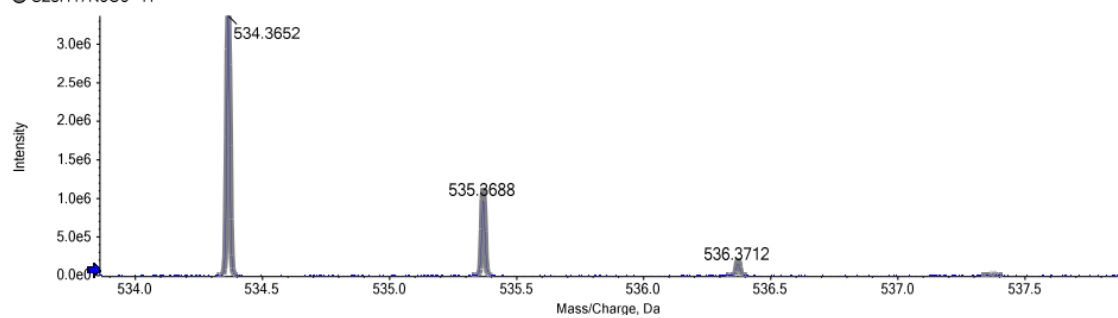

**Figure S22.** HR-ESI-MS spectrum of **Z-8**

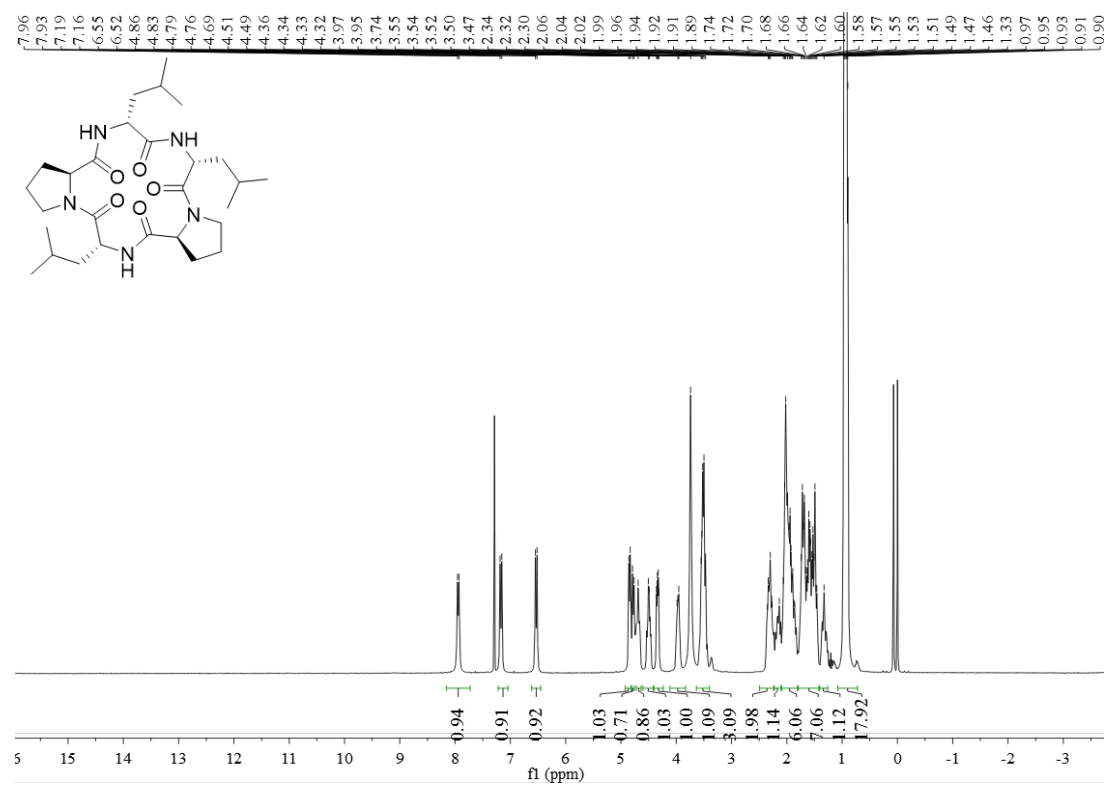

**Figure S23.** <sup>1</sup>H NMR spectrum of **Z-8**

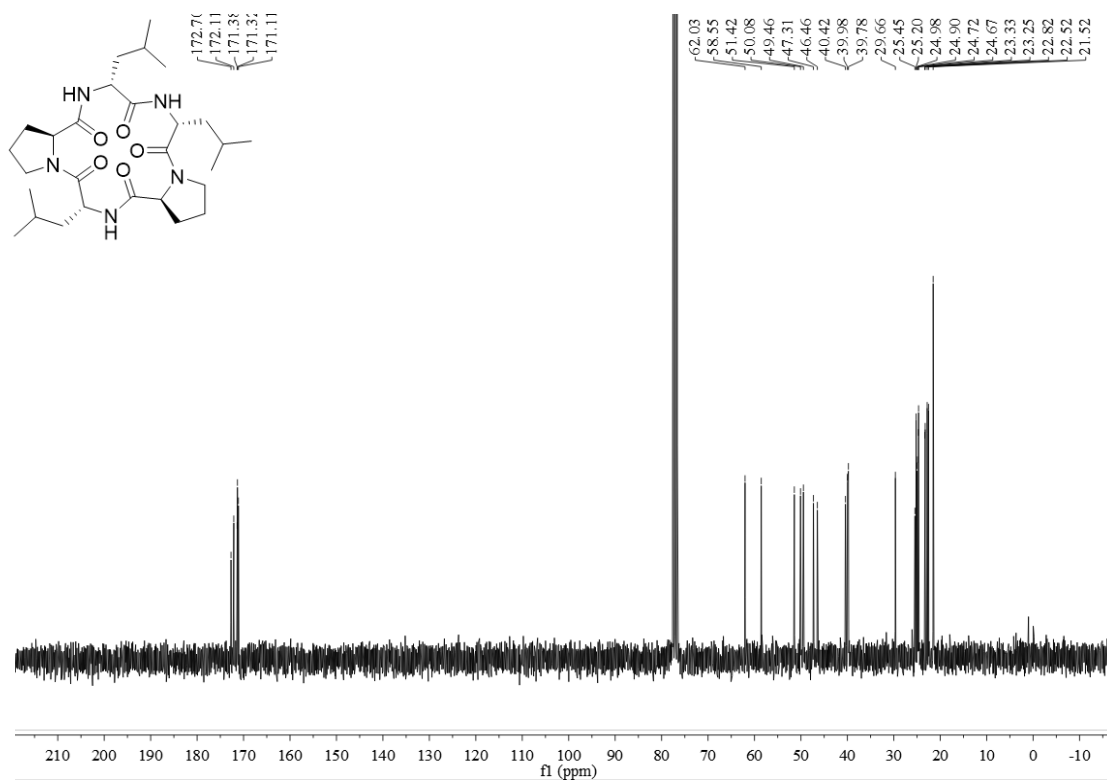

**Figure S24.** <sup>13</sup>C NMR spectrum of **Z-8**
